# Supplementary material for: Landscape Genetics of Plants: Challenges and Opportunities
Source: PubMed Central journal article supplement — Plant Commun. 2020 Jul 20;1(6):100100. doi: 10.1016/j.xplc.2020.100100 (PMC7748010; doi:10.1016/j.xplc.2020.100100), 2020-07-20
Supplement: mmc1.pdf [file mmc1.pdf]

**Plant Communications, Volume 1**

**Supplemental Information**

**Landscape Genetics of Plants: Challenges and Opportunities**

**Mitchell B. Cruzan and Elizabeth C. Hendrickson**

1 Supplemental Information.

2

3 Sampling and genetic methods for landscape genetic studies of *Plectritis congesta* and *Achyrachaena*  
4 *mollis*.

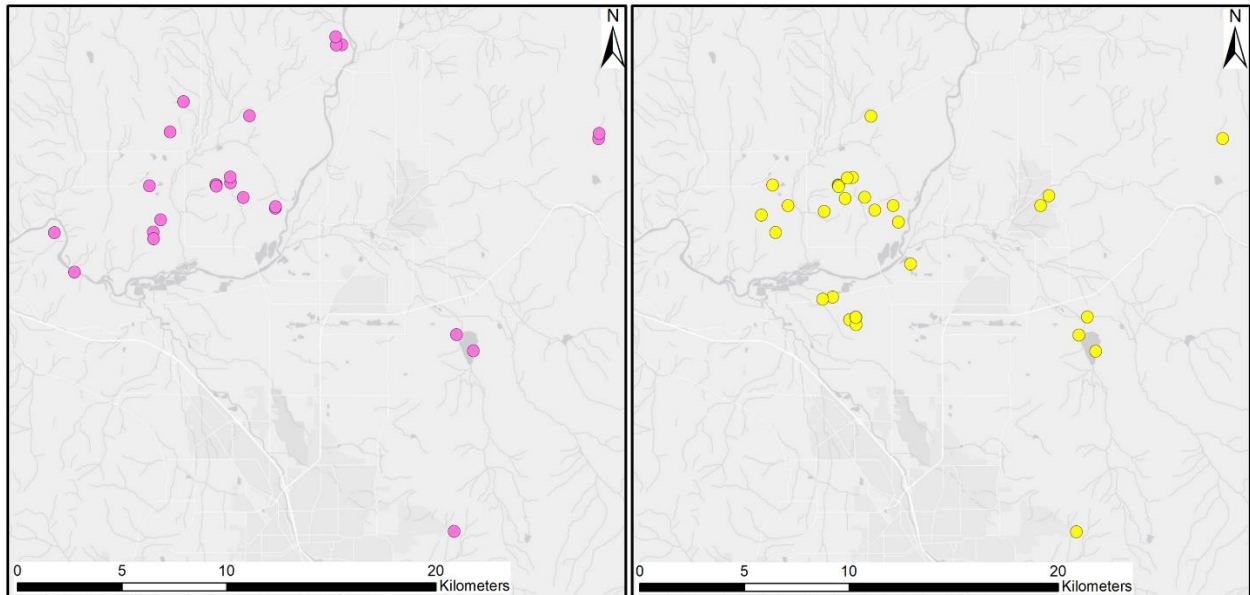

5

6 Supplemental Figure 1. Tissue samples were collected from 26 *Plectritis congesta* populations (left) and  
7 35 *Achyrachaena mollis* populations (right) throughout the Medford region in southern Oregon.

8 Approximately 20 individuals were collected at each population. Whole chloroplast genome sequencing  
9 was conducted with pooled samples following the protocol described in Kohn et al. 2017.

10

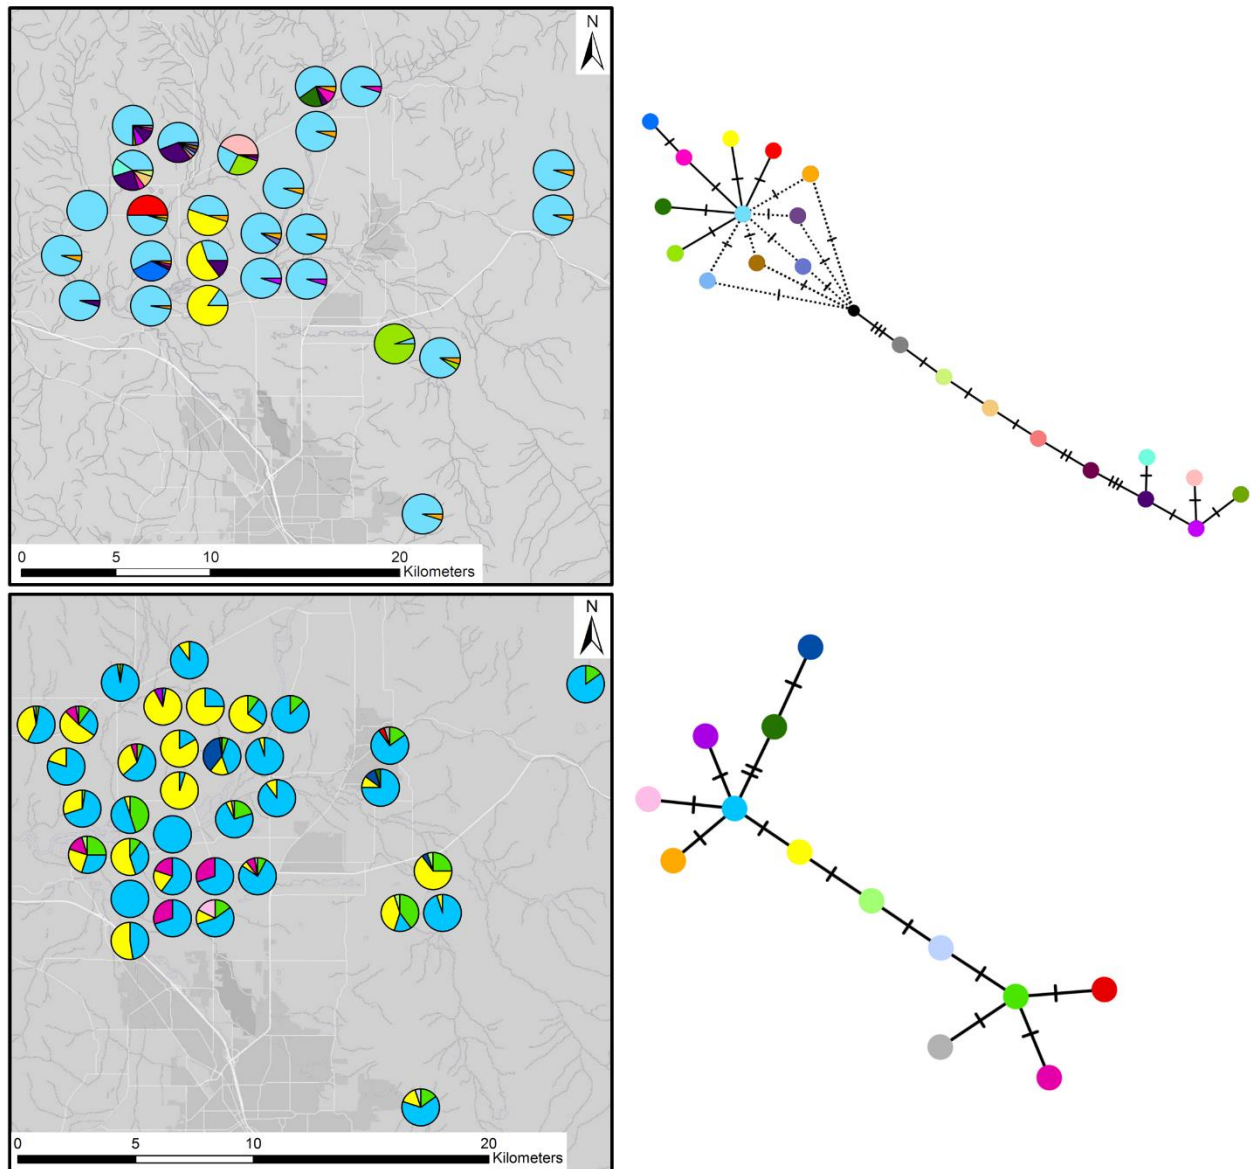

12  
 13 Supplemental Figure 2. The top panels depict the genetic structure of *Plectritis congesta* populations,  
 14 and the bottom panels depict the genetic structure of *Achyrachaena mollis* following protocols  
 15 described in CallHap (Kohn et al. 2017). Within the study region, 22 unique haplotypes were discovered  
 16 for *Plectritis congesta*, and 13 unique haplotypes were discovered for *Achyrachaena mollis*. Each pie  
 17 chart displays the haplotypes discovered within the population. The colors within the pie chart  
 18 represent a unique haplotype identified by the pipeline, which corresponds to the haplotype network on  
 19 the right. Within the haplotype network, each haplotype is assigned to a node, which are separated with  
 20 novel single nucleotide polymorphisms (tick marks). Haplotypes that are centrally located within the  
 21 haplotype network are considered to be older and are generally widespread. Their distribution is most  
 22 likely an effect of coalescence and a shared evolutionary history, while more contemporary dispersal  
 23 events can be observed in the sharing of haplotypes located on terminal nodes of the network.  
 24
